# Supplementary material for: Effect of Sr and Ti substitutions on optical and photocatalytic properties of Bi1−xSrxFe1−xTixO3 nanomaterials
Source: Royal Society of Chemistry journal article supplement (doi:10.1039/d2na00755j), 2022-12-28
Supplement: d2na00755j1.pdf [file d2na00755j1.pdf]

## Effect of Sr and Ti substitutions on optical and photocatalytic properties of $\text{Bi}_{1-x}\text{Sr}_x\text{Fe}_{1-x}\text{Ti}_x\text{O}_3$ nanomaterials

Manal Benyoussef<sup>a</sup>, Sébastien Saitzek<sup>b</sup>, Nitul S. Rajput<sup>c</sup>, Mimoun El Marssi<sup>a</sup> and Mustapha Jouiad<sup>\*a</sup>

<sup>a</sup> Laboratory of Physics of Condensed Matter (LPMC), University of Picardie Jules Verne, Scientific Pole, 33 Rue Saint-Leu, CEDEX 1, 80039 Amiens, France.

<sup>b</sup> Université d'Artois, CNRS, Centrale Lille, ENSCL, Université de Lille, UMR 8181, Unité de Catalyse et Chimie du Solide (UCCS), 62300 Lens, France.

<sup>c</sup> Advanced Materials Research Center, Technology Innovation Institute, Abu Dhabi P.O. Box 9639, United Arab Emirates.

\* Correspondence Email: mustapha.jouiad@u-picardie.fr

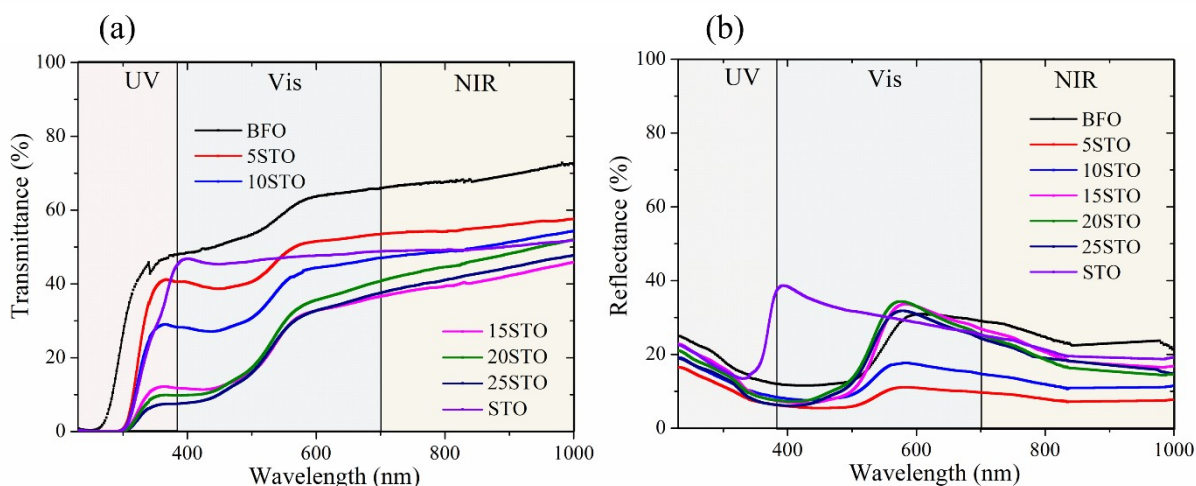

**Figure S1:** Optical properties of BFO-xSTO films using as-synthesized powders: a) transmittance, and b) reflectance of BFO-xSTO films.

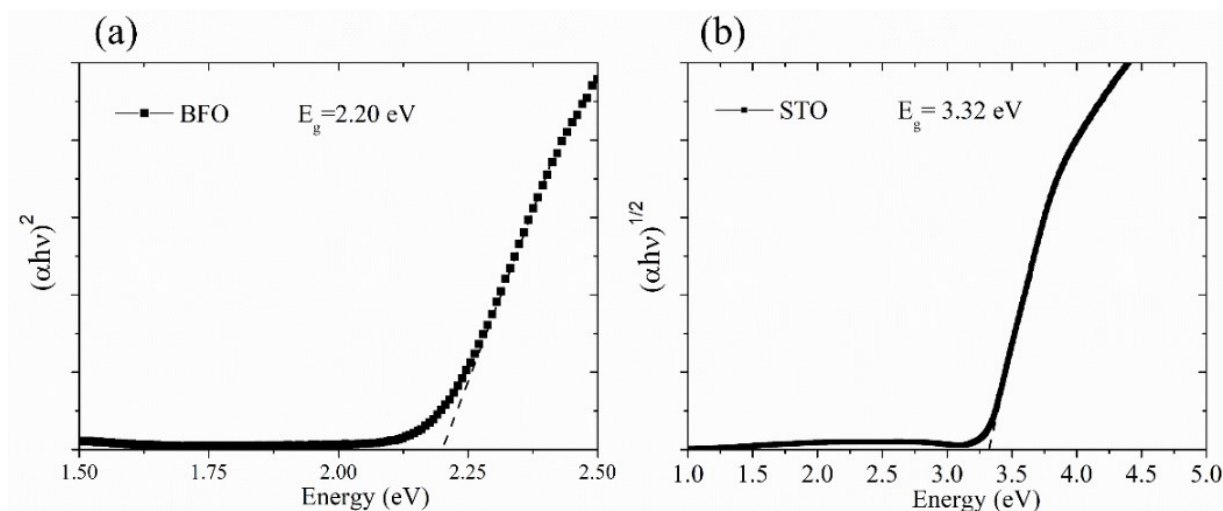

**Figure S2:** Tauc plots of pristine (a) BFO, and (b) STO films using as-synthesized powders.

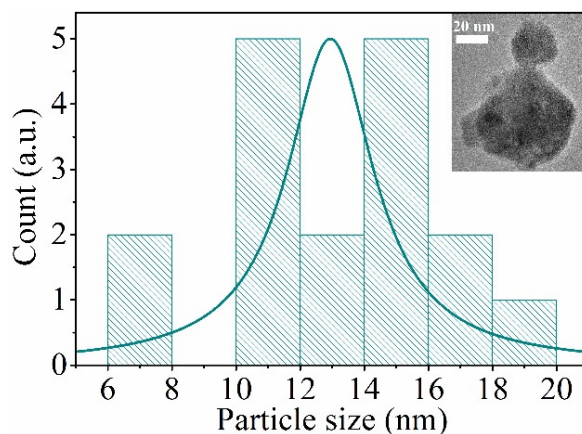

**Figure S3:** The size distribution of the 5%STO nanoparticles. The inset shows its corresponding bright field TEM image.

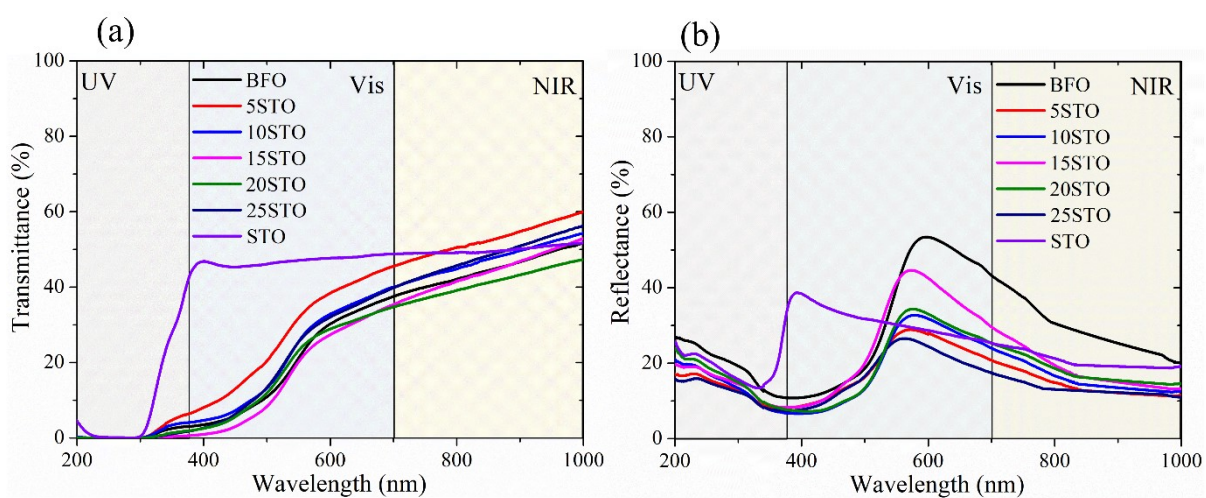

**Figure S4:** Optical properties of BFO-xSTO films with second milled powders of tens of nanometers: a) transmittance, and b) reflectance.

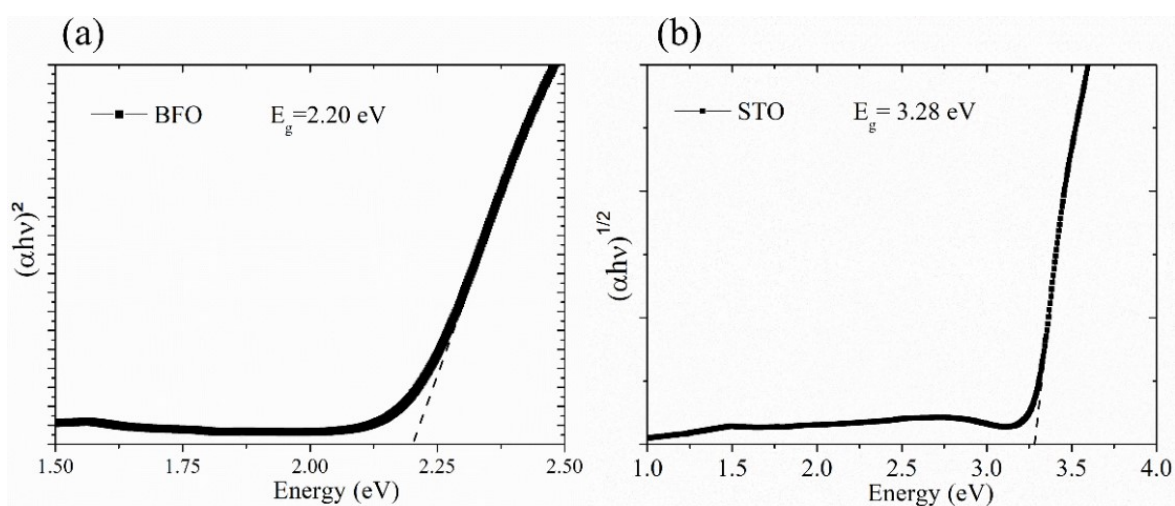

**Figure S5:** Tauc plots of pristine (a) BFO, and (b) STO films with secondly milled powders.

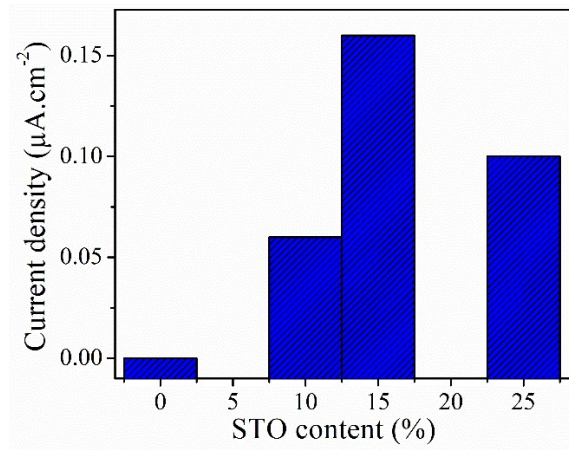

**Figure S6:** Evolution of  $\Delta j$  with STO content for an excitation of 450 nm at  $118 \text{ mW}\cdot\text{cm}^{-2}$  with no applied bias potential.
